# Supplementary figures and images for: The Influence of Structural Variants of the CES1 Gene on the Pharmacokinetics of Enalapril, Presumably Due to Linkage Disequilibrium with the Intronic rs2244613
Source: MDPI journal article supplement (doi:10.3390/genes13122225), 2022-11-27

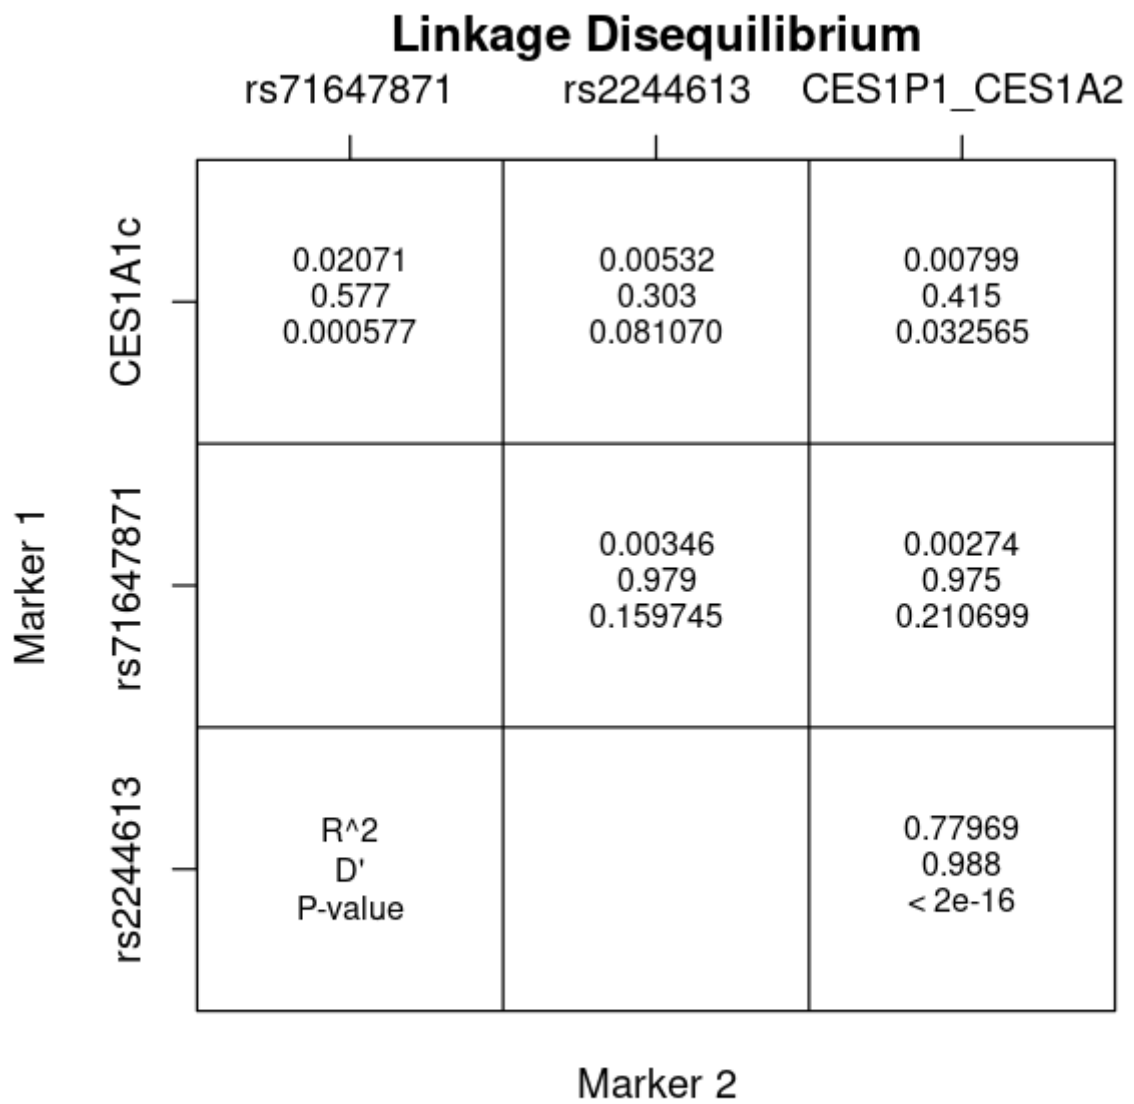

**Figure S1.** Linkage disequilibrium analysis of studied variants in the *CES1* gene.

Supplement: s1 [file s1]
